# Supplementary material for: Photoinduced Oxygen Evolution Catalysis Promoted by Polyoxometalate Salts of Cationic Photosensitizers
Source: PubMed Central journal article supplement (PMC6102367; doi:10.3389/fchem.2018.00302), 2018-08-14
Supplement: Data_Sheet_1.pdf [file Data_Sheet_1.pdf]

**SUPPLEMENTARY INFORMATION**

**Table S1:** CHN , ICP and TGA analysis for the **RuCo<sub>9</sub>** salt before and after the light-driven water oxidation experiments, as compared with possible stoichiometries.

|                                                                                             | %Ru | %Co | %W   | %K  | %C   | %H   | %N  | %H <sub>2</sub> O |
|---------------------------------------------------------------------------------------------|-----|-----|------|-----|------|------|-----|-------------------|
| Fresh TGA                                                                                   |     |     |      |     |      |      |     | 6.1               |
| Fresh CHN                                                                                   |     |     |      |     | 17.8 | 1.9  | 4.0 |                   |
| Fresh ICP                                                                                   | 3.9 | 4.2 | 45.5 | 2.5 |      |      |     |                   |
| [Ru(bpy) <sub>3</sub> ] <sub>2</sub> K <sub>12</sub> [Co <sub>9</sub> ].33H <sub>2</sub> O  | 2.1 | 5.4 | 50.5 | 4.8 | 7.4  | 1.2  | 1.8 | 6.1               |
| [Ru(bpy) <sub>3</sub> ] <sub>3</sub> K <sub>10</sub> [Co <sub>9</sub> ].35H <sub>2</sub> O  | 2.9 | 5.1 | 47.8 | 3.8 | 10.5 | 1.4  | 2.6 | 6.1               |
| [Ru(bpy) <sub>3</sub> ] <sub>4</sub> K <sub>8</sub> [Co <sub>9</sub> ].37H <sub>2</sub> O   | 3.7 | 4.8 | 45.4 | 2.8 | 13.3 | 1.6  | 3.3 | 6.1               |
| [Ru(bpy) <sub>3</sub> ] <sub>4.5</sub> K <sub>7</sub> [Co <sub>9</sub> ].38H <sub>2</sub> O | 4.1 | 4.7 | 44.3 | 2.4 | 14.6 | 1.7  | 3.6 | 6.1               |
| <b>[Ru(bpy)<sub>3</sub>]<sub>5</sub>K<sub>6</sub>[Co<sub>9</sub>].39H<sub>2</sub>O</b>      | 4.4 | 4.6 | 43.2 | 2.0 | 15.8 | 1.7  | 3.9 | 6.1               |
| [Ru(bpy) <sub>3</sub> ] <sub>6</sub> K <sub>4</sub> [Co <sub>9</sub> ].41H <sub>2</sub> O   | 5.0 | 4.4 | 41.2 | 1.3 | 18.1 | 1.9  | 4.5 | 6.1               |
| [Ru(bpy) <sub>3</sub> ] <sub>7</sub> K <sub>2</sub> [Co <sub>9</sub> ].43H <sub>2</sub> O   | 5.6 | 4.2 | 39.4 | 0.6 | 20.2 | 2.0  | 5.0 | 6.2               |
| [Ru(bpy) <sub>3</sub> ] <sub>8</sub> [Co <sub>9</sub> ].45H <sub>2</sub> O                  | 6.2 | 4.0 | 37.7 | 0   | 22.1 | 2.2  | 5.5 | 6.2               |
| Used TGA                                                                                    |     |     |      |     |      |      |     | 4.0               |
| Used CHN                                                                                    |     |     |      |     | 15.9 | 1.43 | 3.8 |                   |
| Used ICP                                                                                    | 3.5 | 3.5 | 48.3 | 2.8 |      |      |     |                   |
| [Ru(bpy) <sub>3</sub> ] <sub>2</sub> K <sub>12</sub> [Co <sub>9</sub> ].21H <sub>2</sub> O  | 2.1 | 5.5 | 51.7 | 4.9 | 7.6  | 0.9  | 1.9 | 4.0               |
| [Ru(bpy) <sub>3</sub> ] <sub>3</sub> K <sub>10</sub> [Co <sub>9</sub> ].23H <sub>2</sub> O  | 3.0 | 5.2 | 48.8 | 3.9 | 10.7 | 1.2  | 2.7 | 4.1               |
| [Ru(bpy) <sub>3</sub> ] <sub>4</sub> K <sub>8</sub> [Co <sub>9</sub> ].24H <sub>2</sub> O   | 3.8 | 5.0 | 46.4 | 2.9 | 13.6 | 1.4  | 3.4 | 4.0               |
| [Ru(bpy) <sub>3</sub> ] <sub>4.5</sub> K <sub>7</sub> [Co <sub>9</sub> ].25H <sub>2</sub> O | 4.1 | 4.8 | 45.2 | 2.5 | 14.9 | 1.5  | 3.7 | 4.0               |
| [Ru(bpy) <sub>3</sub> ] <sub>5</sub> K <sub>6</sub> [Co <sub>9</sub> ].25H <sub>2</sub> O   | 4.5 | 4.7 | 44.2 | 2.1 | 16.2 | 1.5  | 4.0 | 4.1               |
| [Ru(bpy) <sub>3</sub> ] <sub>6</sub> K <sub>4</sub> [Co <sub>9</sub> ].26H <sub>2</sub> O   | 5.2 | 4.5 | 42.2 | 1.3 | 18.5 | 1.7  | 4.6 | 4.0               |
| [Ru(bpy) <sub>3</sub> ] <sub>7</sub> K <sub>2</sub> [Co <sub>9</sub> ].27H <sub>2</sub> O   | 5.8 | 4.3 | 40.3 | 0.6 | 20.7 | 1.8  | 5.1 | 4.0               |
| [Ru(bpy) <sub>3</sub> ] <sub>8</sub> [Co <sub>9</sub> ].28H <sub>2</sub> O                  | 6.3 | 4.1 | 38.6 | 0   | 22.6 | 2.0  | 5.6 | 4.0               |

**Table S2:** Crystallographic parameters for the structure of  $[\text{Ru}(\text{bpy})_3]_2\text{K}_{12}[\text{Co}_9(\text{H}_2\text{O})_6(\text{OH})_3(\text{HPO}_4)_2(\text{PW}_9\text{O}_{34})_3]\cdot x\text{H}_2\text{O}$ .

|                       |            |
|-----------------------|------------|
| Crystal system        | Triclinic  |
| Space group           | P-1        |
| $a$ (Å)               | 13.1889(8) |
| $b$ (Å)               | 27.4351(7) |
| $c$ (Å)               | 29.505(2)  |
| $\alpha$ (°)          | 99.219(2)  |
| $\beta$ (°)           | 96.680(2)  |
| $\gamma$ (°)          | 93.043(2)  |
| $V$ (Å <sup>3</sup> ) | 10438.7(3) |
| $Z$                   | 2          |

The high disorder of the solvent molecules and counter-cations did not allow us to complete the data refinement. However, the large size of the  $[\text{Ru}(\text{bpy})_3]^{2+}$  allows us to confirm the  $[\text{Ru}(\text{bpy})_3]/[\text{Co}_9(\text{H}_2\text{O})_6(\text{OH})_3(\text{HPO}_4)_2(\text{PW}_9\text{O}_{34})_3]$  stoichiometry, since there is no available space for an additional  $[\text{Ru}(\text{bpy})_3]^{2+}$  in the unit cell (Figure S13). We assign a  $\text{K}_{12}$  stoichiometry because no other cations were used during synthesis.

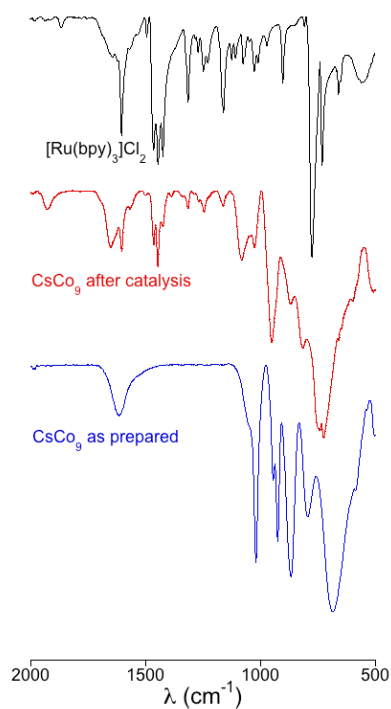

**Figure S1:** FT-IR spectra of the  $\text{CsCo}_9$  salt before (blue) and after (red) light-driven water oxidation experiments vs. commercial  $[\text{Ru}(\text{bpy})_3]\text{Cl}_2$  (black) as a reference.

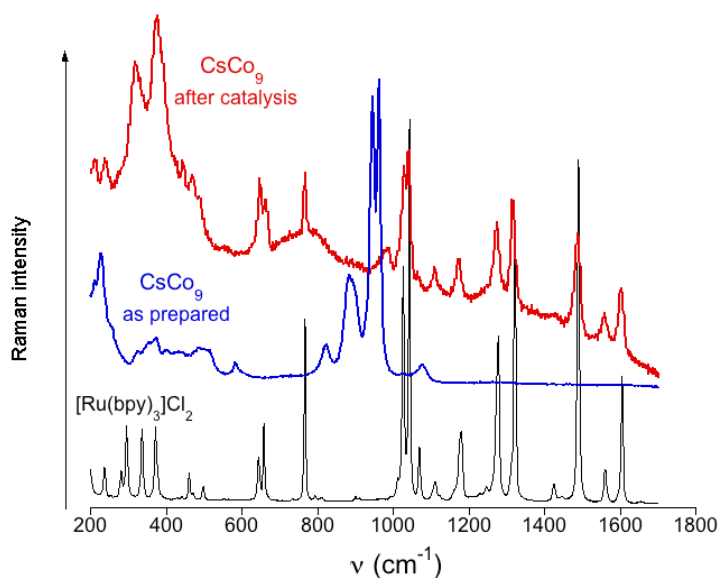

**Figure S2:** Raman spectra of the  $\text{CsCo}_9$  salt before (blue) and after (red) light-driven water oxidation experiments vs. commercial  $[\text{Ru}(\text{bpy})_3]\text{Cl}_2$  (black) as a reference.

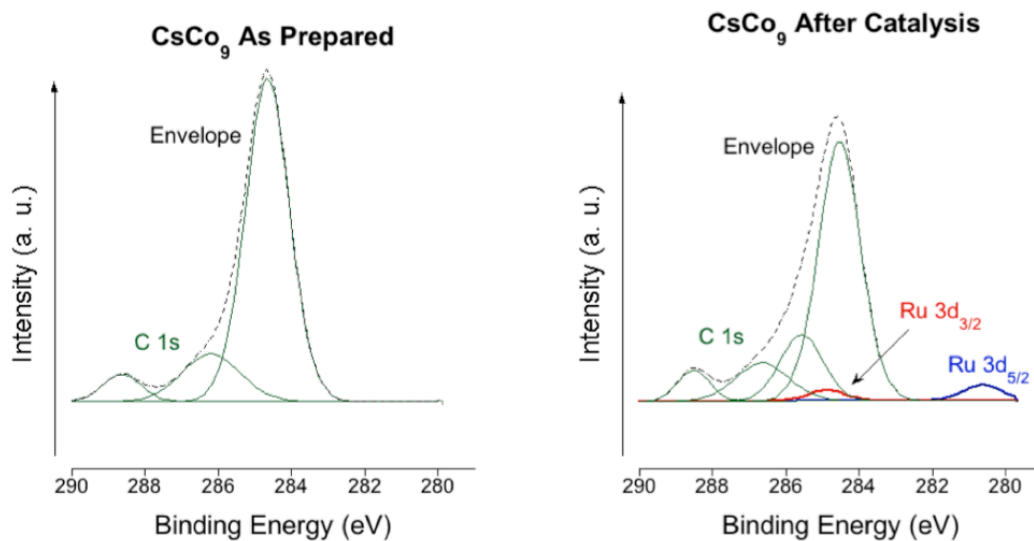

**Figure S3:** Ru 3d (blue and red) and C 1s (green) XPS spectra of CsCo<sub>9</sub> as prepared (left) and collected after the light-driven water oxidation experiments (right).

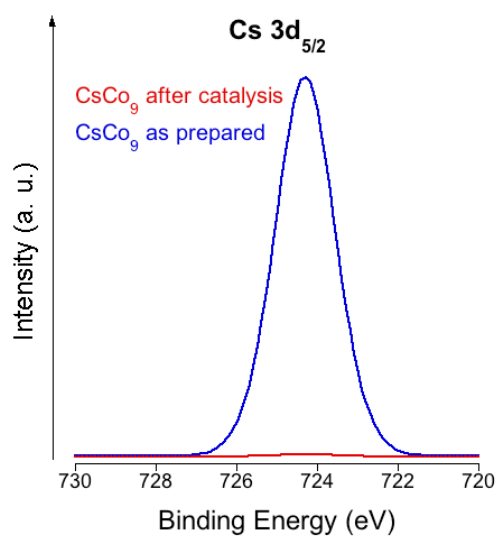

**Figure S4:** Cs 3d<sub>5/2</sub> XPS spectra of CsCo<sub>9</sub> as prepared (blue) and collected after the light-driven water oxidation experiments (red).

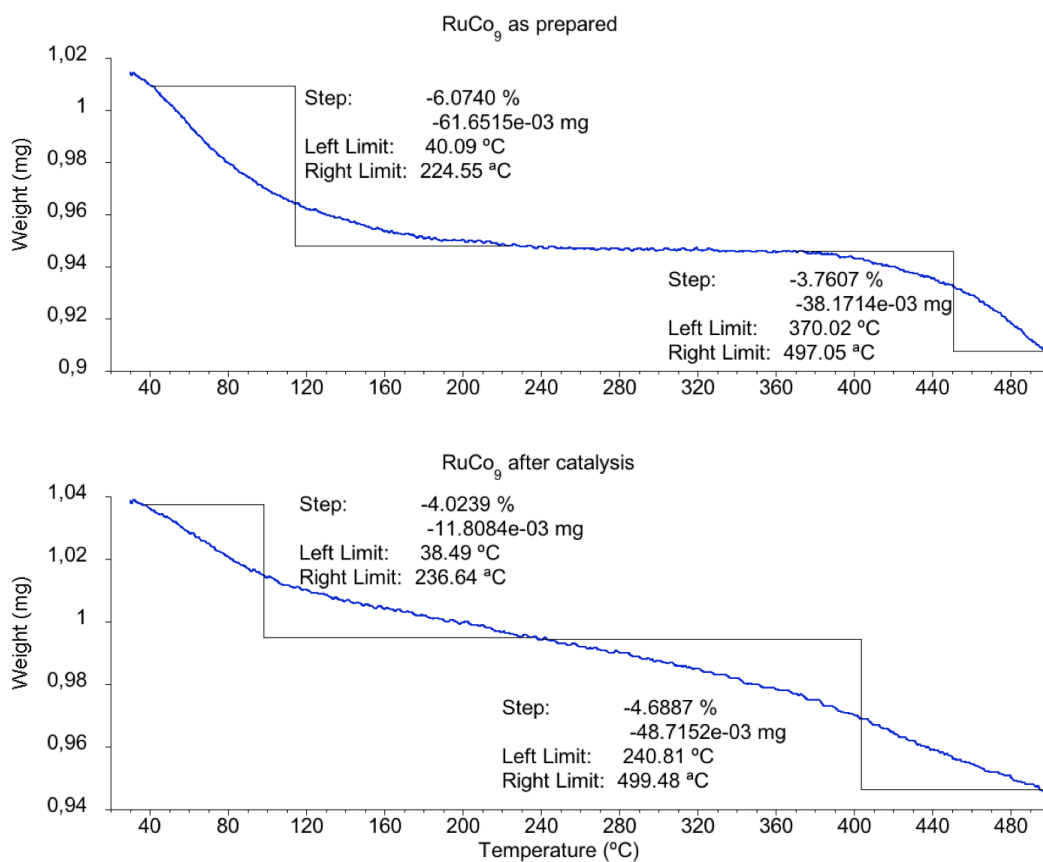

**Figure S5:** Thermogravimetric analysis of the **RuCo<sub>9</sub>** salt before (top) and after (bottom) light-driven water oxidation experiments.

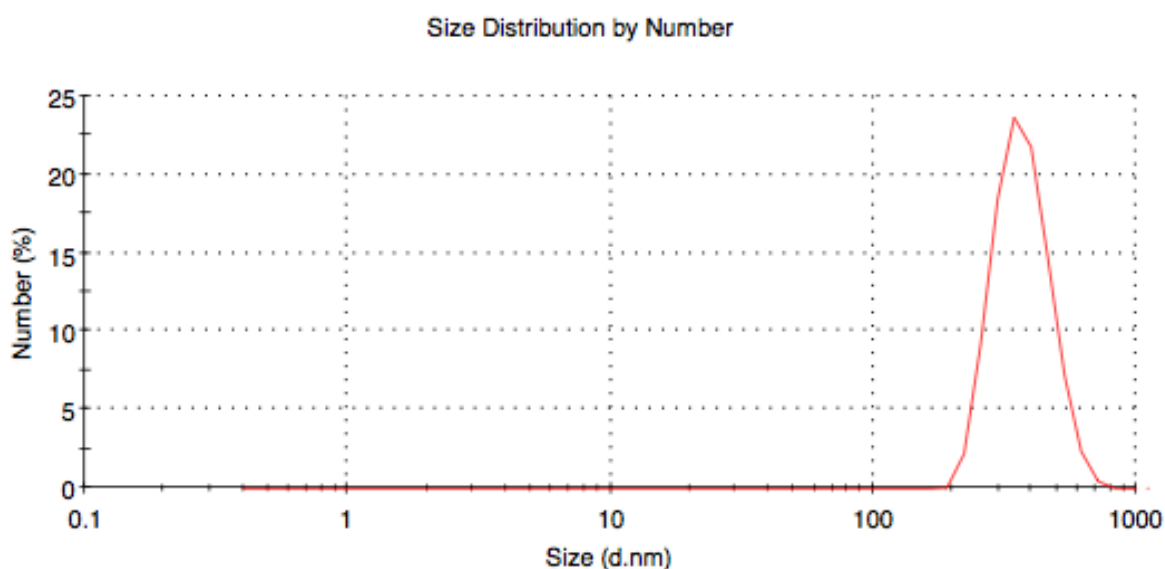

**Figure S6:** Dynamic light scattering measurement of as-prepared **RuCo<sub>9</sub>** salt in suspension in water.

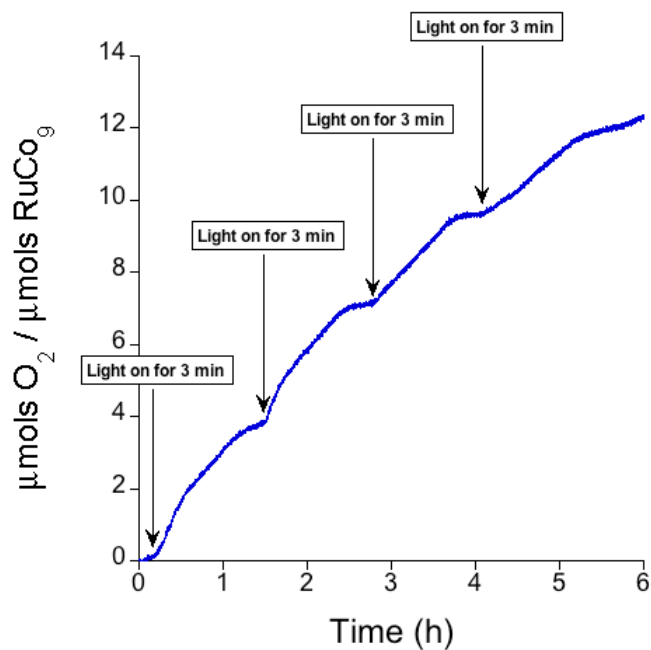

**Figure S7:** Measured oxygen evolution during the pulse experiments employing 10 mg of **RuCo<sub>9</sub>** in a **KP<sub>i</sub>** (40 mM) buffer at pH 7 with **S<sub>2</sub>O<sub>8</sub><sup>2-</sup>** (5 mM) as sacrificial electron acceptor.

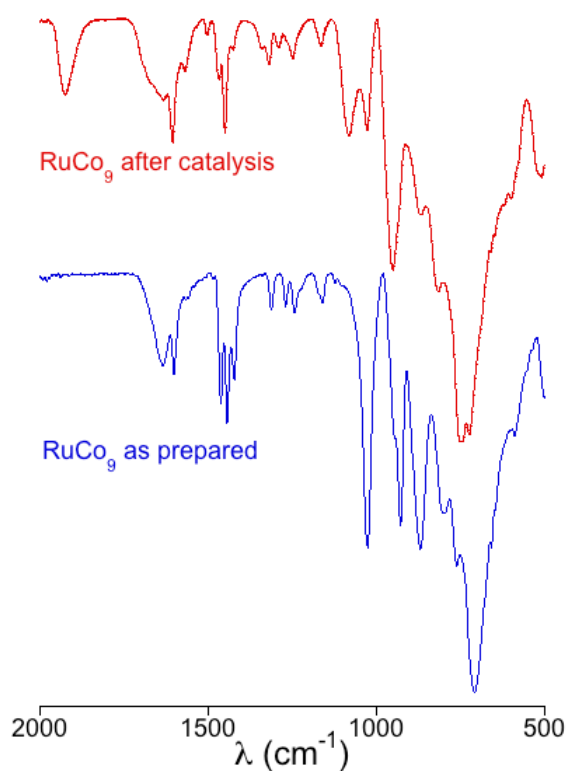

**Figure S8:** FT-IR spectra of the **RuCo<sub>9</sub>** salt before (blue) and after (red) light-driven water oxidation experiments.

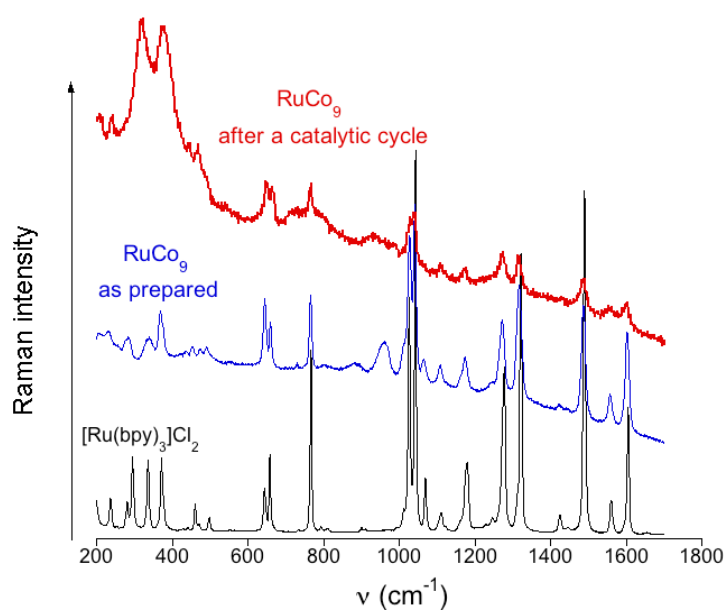

**Figure S9:** Raman spectra of the **RuCo<sub>9</sub>** salt before (blue) and after (red) light-driven water oxidation experiments vs. commercial [Ru(bpy)<sub>3</sub>]Cl<sub>2</sub> (black) as a reference.

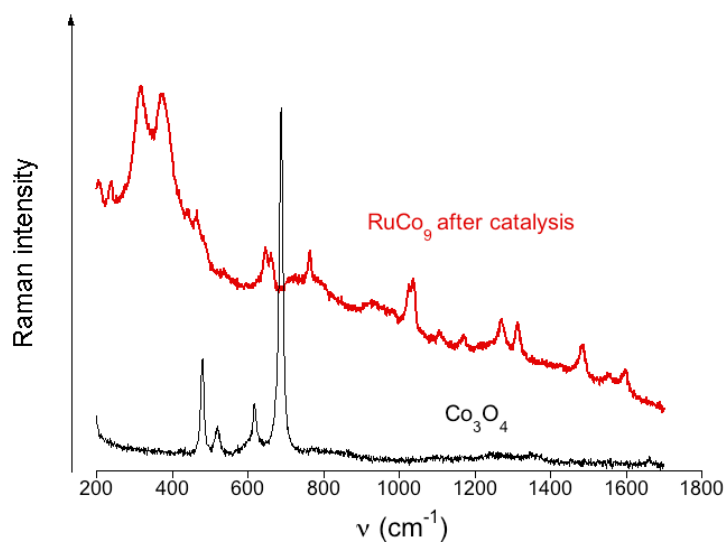

**Figure S10:** Raman spectra of the collected **RuCo<sub>9</sub>** salt (red) after light-driven water oxidation experiments compared to a pristine Co<sub>3</sub>O<sub>4</sub> (black) reference.

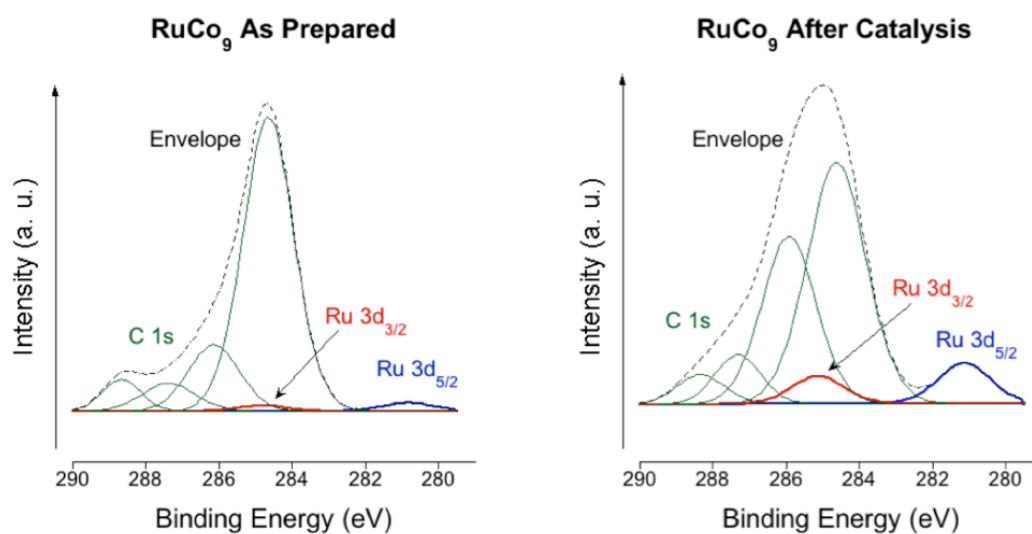

**Figure S11:** Ru 3d (blue and red) and C 1s (green) XPS spectra of **RuCo<sub>9</sub>** as prepared (left) and collected after light-driven water oxidation experiments (right).

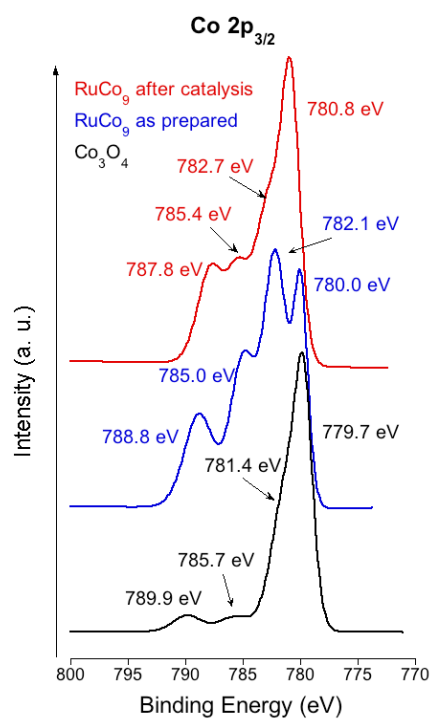

**Figure S12:** Co 2p<sub>3/2</sub> XPS spectra of **RuCo<sub>9</sub>** as prepared (blue) and collected after light-driven water oxidation experiments (red), compared to that obtained with pristine Co<sub>3</sub>O<sub>4</sub> (black).



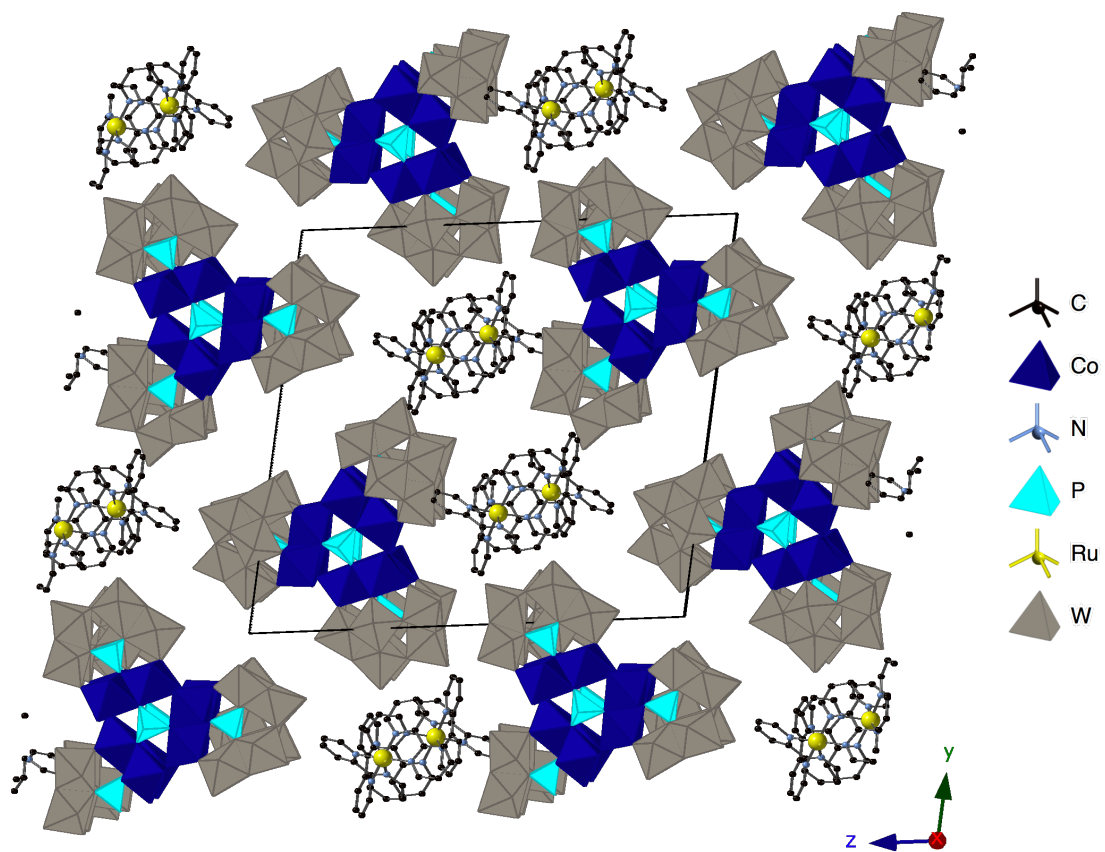

**Figure S13:** Representation of the unit cell for the single crystal of  $[\text{Ru}(\text{bpy})_3]_2\text{K}_{12}[\text{Co}_9(\text{H}_2\text{O})_6(\text{OH})_3(\text{HPO}_4)_2(\text{PW}_9\text{O}_{34})_3] \cdot x\text{H}_2\text{O}$  (cf. Table S1).

## LIGHT-DRIVEN WATER OXIDATION CATALYSIS TESTS

The number of mols of O<sub>2</sub> produced during the experiments were calculated from the %O<sub>2</sub> given by the oxygen-sensing probe employing the Dalton's law of partial pressures:

$$\%O_2 = \frac{P_{O_2}}{P_T} \times 100$$

where P<sub>O<sub>2</sub></sub> is the partial pressure of the O<sub>2</sub> in the gas-space, and P<sub>T</sub> is the total pressure and equal to 1 atm. Therefore, by substituting P<sub>O<sub>2</sub></sub> into the ideal gas law we can calculate the number of mols of O<sub>2</sub> produced as:

$$n_{O_2} = \frac{\frac{\%O_2}{100} V_{gs}}{RT}$$

where n<sub>O<sub>2</sub></sub> = number of moles of O<sub>2</sub>; %O<sub>2</sub> = percentage of O<sub>2</sub> present in the gas-space; V<sub>gs</sub> = gas-space volume (in L); R (gas constant) = 0.082 atmL/molK; and T = 298K.

The turnover number (TON) was calculated as:

$$TON = \frac{n_{O_2}}{n_{cat}}$$

where n<sub>O<sub>2</sub></sub> = number of moles of O<sub>2</sub>, and n<sub>cat</sub> = number of moles of catalyst.

The turnover frequency (TOF, h<sup>-1</sup>) was calculated by plotting n<sub>O<sub>2</sub></sub>/n<sub>cat</sub> vs. time. The slope at the beginning of the O<sub>2</sub> evolution follows a linear fit, and it is equal to the TOF, following the relationship:

$$TOF = \frac{n_{O_2}}{n_{cat} \cdot t} = \text{slope}$$

The chemical yield (CY, %) was calculated as:

$$CY = \frac{2 \cdot n_{O_2}}{n_{S_2O_8^{2-}}} \times 100$$

where n<sub>O<sub>2</sub></sub> = number of moles of O<sub>2</sub>, and n<sub>S<sub>2</sub>O<sub>8</sub><sup>2-</sup></sub> = number of moles of Na<sub>2</sub>S<sub>2</sub>O<sub>8</sub>. The number two arises because the formation of O<sub>2</sub> requires the removal of four electrons, but the photochemical process using the [Ru(bpy)<sub>3</sub>]<sup>2+</sup>/S<sub>2</sub>O<sub>8</sub><sup>2-</sup> assay accepts only two electrons.
